# Supplementary material for: Impact of gender on event rates at 1 year in patients with newly diagnosed non-valvular atrial fibrillation: contemporary perspective from the GARFIELD-AF registry
Source: PubMed Central journal article supplement — BMJ Open. 2017 Mar 6;7(3):e014579. doi: 10.1136/bmjopen-2016-014579 (PMC5353285; doi:10.1136/bmjopen-2016-014579), 2017-03-06
Supplement: bmjopen-2016-014579supp_appendix.pdf [file bmjopen-2016-014579supp_appendix.pdf]

## Appendix A

### **Impact of gender on event rates at 1 year in patients with newly diagnosed non-valvular atrial fibrillation: contemporary perspective from the GARFIELD-AF registry**

A John Camm<sup>1</sup>, Gabriele Accetta<sup>2</sup>, Wael Al Mahmeed<sup>3</sup>, Giuseppe Ambrosio<sup>4</sup>, Samuel Z Goldhaber<sup>5</sup>, Sylvia Haas<sup>6</sup>, Petr Jansky<sup>7</sup>, Gloria Kayani<sup>2</sup>, Frank Misselwitz<sup>8</sup>, Seil Oh<sup>9</sup>, Ali Oto<sup>10</sup>, Pekka Raatikainen<sup>11</sup>, Jan Steffel<sup>12</sup>, Martin van Eickels<sup>8</sup>, Ajay K Kakkar<sup>2,13</sup>, for the GARFIELD-AF Investigators\*

<sup>1</sup>St George's University of London, and Imperial College, London, United Kingdom

<sup>2</sup>Thrombosis Research Institute, London, United Kingdom

<sup>3</sup>Heart and Vascular Institute, Cleveland Clinic Abu Dhabi, United Arab Emirates

<sup>4</sup>University of Perugia School of Medicine, Perugia, Italy

<sup>5</sup>Harvard Medical School, Boston, USA

<sup>6</sup>Formerly Technical University Of Munich, Munich, Germany

<sup>7</sup>Motol University Hospital, Prague, Czech Republic

<sup>8</sup>Bayer HealthCare Pharmaceuticals, Berlin, Germany

<sup>9</sup>Seoul National University College of Medicine, Seoul, Republic of Korea

<sup>10</sup>Hacettepe University, Ankara, Turkey

<sup>11</sup>Tampere University Hospital, Tampere, Finland

<sup>12</sup>University Hospital Zurich, Zurich, Switzerland

<sup>13</sup>University College London, London, United Kingdom

**Supplementary Table 1.** Hazard ratios for stroke/SE after multiple imputation. Model 3 only contains “significant interactions between gender and risk” defined as  $p < 0.20$ .

| STROKE/SE                                               | Model 1 without interaction |        |      | Model 2 with interactions |        |      |       |        |      | p-value interaction with gender | Model 3 with important interactions |        |      |       |  |
|---------------------------------------------------------|-----------------------------|--------|------|---------------------------|--------|------|-------|--------|------|---------------------------------|-------------------------------------|--------|------|-------|--|
|                                                         | HR                          | 95% CI |      | HR                        | 95% CI |      | HR    | 95% CI |      |                                 | HR                                  | 95% CI |      |       |  |
|                                                         | MEN AND WOMEN               |        |      | MEN                       |        |      | WOMEN |        |      |                                 |                                     |        |      |       |  |
| Female (ref: male)                                      | 1.30                        | 1.04   | 1.63 | -                         | -      | -    | -     | -      | -    | -                               |                                     |        |      |       |  |
| Age 65-69 years (ref: <65)                              | 1.67                        | 1.15   | 2.41 | 2.39                      | 1.50   | 3.81 | 0.93  | 0.50   | 1.75 | 0.17                            | 2.37                                | 1.49   | 3.76 | Men   |  |
|                                                         |                             |        |      |                           |        |      |       |        |      |                                 | 0.93                                | 0.50   | 1.75 | Women |  |
| Age 70-74 years (ref: <65)                              | 1.91                        | 1.35   | 2.69 | 2.45                      | 1.55   | 3.87 | 1.38  | 0.82   | 2.33 | -                               | 2.41                                | 1.53   | 3.79 | Men   |  |
|                                                         |                             |        |      |                           |        |      |       |        |      |                                 | 1.38                                | 0.82   | 2.33 | Women |  |
| Age >= 75 years (ref: <65)                              | 2.09                        | 1.54   | 2.85 | 2.05                      | 1.34   | 3.16 | 1.89  | 1.21   | 2.94 | -                               | 1.98                                | 1.30   | 3.03 | Men   |  |
|                                                         |                             |        |      |                           |        |      |       |        |      |                                 | 1.89                                | 1.21   | 2.94 | Women |  |
| Diabetes mellitus (ref: no)                             | 1.09                        | 0.86   | 1.39 | 1.18                      | 0.83   | 1.66 | 1.04  | 0.74   | 1.46 | 0.63                            | 1.10                                | 0.87   | 1.41 |       |  |
| Hypertension as in CHA2DS2-Vasc (ref: no)               | 1.17                        | 0.87   | 1.57 | 1.15                      | 0.77   | 1.70 | 1.19  | 0.76   | 1.85 | 0.90                            | 1.16                                | 0.87   | 1.56 |       |  |
| Stroke/TIA/SE as in CHA2DS2-Vasc (ref: no)              | 2.14                        | 1.68   | 2.72 | 2.69                      | 1.92   | 3.77 | 1.69  | 1.20   | 2.38 | 0.06                            | 2.64                                | 1.89   | 3.69 | Men   |  |
|                                                         |                             |        |      |                           |        |      |       |        |      |                                 | 1.69                                | 1.20   | 2.38 | Women |  |
| Congestive cardiac failure as in CHA2DS2-Vasc (ref: no) | 1.25                        | 1.00   | 1.57 | 1.34                      | 0.97   | 1.86 | 1.18  | 0.86   | 1.61 | 0.57                            | 1.25                                | 1.00   | 1.57 |       |  |
| History of bleeding (ref: no)                           | 1.54                        | 0.97   | 2.43 | 1.25                      | 0.63   | 2.46 | 1.85  | 1.00   | 3.44 | 0.40                            | 1.53                                | 0.97   | 2.42 |       |  |
| Vascular disease (ref: no)                              | 1.15                        | 0.89   | 1.50 | 1.01                      | 0.70   | 1.46 | 1.33  | 0.92   | 1.95 | 0.30                            | 1.15                                | 0.89   | 1.50 |       |  |
| AC Treatment (ref: no)                                  | 0.59                        | 0.48   | 0.73 | 0.45                      | 0.33   | 0.61 | 0.77  | 0.57   | 1.03 | 0.01                            | 0.46                                | 0.34   | 0.62 | Men   |  |
|                                                         |                             |        |      |                           |        |      |       |        |      |                                 | 0.77                                | 0.57   | 1.03 | Women |  |
| Race: Asian/Chinese (ref: Caucasian/Hispanic/Latino)    | 0.97                        | 0.75   | 1.24 | 0.93                      | 0.65   | 1.32 | 0.99  | 0.69   | 1.42 | 0.89                            | 0.96                                | 0.74   | 1.23 |       |  |

|                                                            |      |      |      |      |      |      |      |      |      |      |      |      |      |
|------------------------------------------------------------|------|------|------|------|------|------|------|------|------|------|------|------|------|
| Ex-smoker (ref: no)                                        | 0.95 | 0.71 | 1.27 | 0.96 | 0.67 | 1.37 | 0.92 | 0.54 | 1.58 | 0.98 | 0.95 | 0.71 | 1.27 |
| Current smoker (ref: no)                                   | 1.56 | 1.11 | 2.19 | 1.51 | 0.99 | 2.31 | 1.60 | 0.85 | 3.03 | -    | 1.53 | 1.09 | 2.15 |
| Permanent AF (ref: Paroxysmal)                             | 1.21 | 0.86 | 1.70 | 1.22 | 0.74 | 2.02 | 1.19 | 0.74 | 1.91 | 0.96 | 1.20 | 0.85 | 1.69 |
| Persistent AF (ref: Paroxysmal)                            | 1.34 | 0.97 | 1.86 | 1.25 | 0.77 | 2.02 | 1.44 | 0.92 | 2.23 | -    | 1.34 | 0.97 | 1.85 |
| New AF (ref: Paroxysmal)                                   | 1.06 | 0.82 | 1.38 | 1.07 | 0.73 | 1.56 | 1.05 | 0.73 | 1.49 | -    | 1.05 | 0.81 | 1.37 |
| Severe Renal disease III-IV-V<br>(ref: I, II, Unknown, no) | 1.53 | 1.16 | 2.02 | 1.30 | 0.83 | 2.04 | 1.70 | 1.19 | 2.42 | 0.36 | 1.53 | 1.16 | 2.02 |

**Supplementary Table 2.** Hazard ratios for Mortality after multiple imputation. Model 3 only contains “significant interactions between gender and risk” defined as  $p < 0.20$ .

| MORTALITY                                               | Model 1 without interaction |        |      | Model 2 with interactions |        |      |       |        |      | p-value interaction with gender | Model 3 with important interactions |        |      |
|---------------------------------------------------------|-----------------------------|--------|------|---------------------------|--------|------|-------|--------|------|---------------------------------|-------------------------------------|--------|------|
|                                                         | HR                          | 95% CI |      | HR                        | 95% CI |      | HR    | 95% CI |      |                                 | HR                                  | 95% CI |      |
|                                                         | MEN AND WOMEN               |        |      | MEN                       |        |      | WOMEN |        |      |                                 |                                     |        |      |
| Female (ref: male)                                      | 1.05                        | 0.92   | 1.19 | -                         | -      | -    | -     | -      | -    | -                               |                                     |        |      |
| Age 65-69 years (ref: <65)                              | 1.67                        | 1.30   | 2.16 | 1.96                      | 1.44   | 2.67 | 1.23  | 0.78   | 1.93 | 0.71                            | 1.68                                | 1.30   | 2.16 |
| Age 70-74 years (ref: <65)                              | 2.13                        | 1.69   | 2.69 | 2.28                      | 1.71   | 3.05 | 1.86  | 1.27   | 2.74 | -                               | 2.13                                | 1.69   | 2.69 |
| Age $\geq$ 75 years (ref: <65)                          | 4.06                        | 3.34   | 4.93 | 4.17                      | 3.27   | 5.32 | 3.72  | 2.69   | 5.15 | -                               | 4.07                                | 3.35   | 4.94 |
| Diabetes mellitus (ref: no)                             | 1.23                        | 1.08   | 1.40 | 1.21                      | 1.01   | 1.46 | 1.24  | 1.02   | 1.51 | 0.86                            | 1.22                                | 1.07   | 1.40 |
| Hypertension as in CHA2DS2-Vasc (ref: no)               | 0.78                        | 0.67   | 0.90 | 0.79                      | 0.65   | 0.97 | 0.75  | 0.60   | 0.95 | 0.73                            | 0.78                                | 0.67   | 0.90 |
| Stroke/TIA/SE as in CHA2DS2-Vasc (ref: no)              | 1.38                        | 1.19   | 1.60 | 1.38                      | 1.13   | 1.70 | 1.35  | 1.09   | 1.68 | 0.88                            | 1.37                                | 1.18   | 1.59 |
| Congestive cardiac failure as in CHA2DS2-Vasc (ref: no) | 2.30                        | 2.04   | 2.59 | 2.35                      | 2.00   | 2.77 | 2.25  | 1.89   | 2.68 | 0.72                            | 2.30                                | 2.05   | 2.59 |
| History of bleeding (ref: no)                           | 1.74                        | 1.38   | 2.21 | 1.37                      | 0.98   | 1.91 | 2.28  | 1.64   | 3.17 | 0.03                            | 1.39                                | 1.00   | 1.95 |
|                                                         |                             |        |      |                           |        |      |       |        |      |                                 | 2.27                                | 1.64   | 3.13 |
|                                                         |                             |        |      |                           |        |      |       |        |      |                                 |                                     |        |      |
| Vascular disease (ref: no)                              | 1.38                        | 1.20   | 1.58 | 1.29                      | 1.08   | 1.55 | 1.50  | 1.21   | 1.85 | 0.29                            | 1.37                                | 1.20   | 1.58 |
| AC Treatment (ref: no)                                  | 0.60                        | 0.53   | 0.68 | 0.57                      | 0.48   | 0.67 | 0.65  | 0.54   | 0.77 | 0.28                            | 0.60                                | 0.53   | 0.68 |
| Race: Asian/Chinese (ref: Caucasian/Hispanic/Latino)    | 0.77                        | 0.66   | 0.91 | 0.70                      | 0.56   | 0.88 | 0.87  | 0.69   | 1.10 | 0.33                            | 0.77                                | 0.66   | 0.91 |
| Ex-smoker (ref: no)                                     | 1.29                        | 1.12   | 1.50 | 1.24                      | 1.04   | 1.48 | 1.42  | 1.11   | 1.84 | 0.61                            | 1.29                                | 1.12   | 1.50 |
| Current smoker (ref: no)                                | 1.43                        | 1.15   | 1.78 | 1.37                      | 1.06   | 1.78 | 1.59  | 1.06   | 2.40 | -                               | 1.43                                | 1.15   | 1.78 |

|                                                            |      |      |      |      |      |      |      |      |      |      |      |      |      |
|------------------------------------------------------------|------|------|------|------|------|------|------|------|------|------|------|------|------|
| Permanent AF (ref: Paroxysmal)                             | 1.27 | 1.03 | 1.56 | 1.22 | 0.91 | 1.62 | 1.32 | 0.98 | 1.78 | 0.49 | 1.27 | 1.03 | 1.56 |
| Persistent AF (ref: Paroxysmal)                            | 1.27 | 1.04 | 1.57 | 1.11 | 0.83 | 1.49 | 1.47 | 1.10 | 1.97 | -    | 1.28 | 1.04 | 1.57 |
| New AF (ref: Paroxysmal)                                   | 1.50 | 1.29 | 1.76 | 1.49 | 1.20 | 1.86 | 1.51 | 1.20 | 1.89 | -    | 1.51 | 1.29 | 1.77 |
| Severe Renal disease III-IV-V<br>(ref: I, II, Unknown, no) | 1.84 | 1.60 | 2.12 | 1.99 | 1.64 | 2.42 | 1.69 | 1.38 | 2.07 | 0.25 | 1.84 | 1.60 | 2.11 |

**Supplementary Table 3.** Hazard ratios for Major Bleeding after multiple imputation

| MAJOR BLEEDING                                          | Model without interaction |        |      | Model with interactions |        |      |              |        |      | p-value interaction with gender |
|---------------------------------------------------------|---------------------------|--------|------|-------------------------|--------|------|--------------|--------|------|---------------------------------|
|                                                         | HR                        | 95% CI |      | HR                      | 95% CI |      | HR           | 95% CI |      |                                 |
|                                                         | <b>MEN AND WOMEN</b>      |        |      | <b>MEN</b>              |        |      | <b>WOMEN</b> |        |      |                                 |
| Female (ref: male)                                      | 1.13                      | 0.85   | 1.50 | -                       | -      | -    | -            | -      | -    | -                               |
| Age 65-69 years (ref: <65)                              | 1.34                      | 0.80   | 2.27 | 1.48                    | 0.77   | 2.84 | 1.13         | 0.47   | 2.73 | 0.64                            |
| Age 70-74 years (ref: <65)                              | 2.13                      | 1.35   | 3.36 | 2.39                    | 1.35   | 4.24 | 1.78         | 0.84   | 3.78 | -                               |
| Age >= 75 years (ref: <65)                              | 2.47                      | 1.64   | 3.71 | 2.37                    | 1.40   | 4.01 | 2.44         | 1.26   | 4.72 | -                               |
| Diabetes mellitus (ref: no)                             | 1.00                      | 0.74   | 1.37 | 1.20                    | 0.80   | 1.81 | 0.80         | 0.50   | 1.30 | 0.21                            |
| Hypertension as in CHA2DS2-Vasc (ref: no)               | 0.92                      | 0.64   | 1.30 | 0.77                    | 0.50   | 1.20 | 1.22         | 0.66   | 2.24 | 0.23                            |
| Stroke/TIA/SE as in CHA2DS2-Vasc (ref: no)              | 1.14                      | 0.80   | 1.62 | 0.92                    | 0.54   | 1.57 | 1.38         | 0.86   | 2.22 | 0.27                            |
| Congestive cardiac failure as in CHA2DS2-Vasc (ref: no) | 0.97                      | 0.71   | 1.30 | 1.03                    | 0.69   | 1.55 | 0.91         | 0.58   | 1.42 | 0.68                            |
| History of bleeding (ref: no)                           | 1.47                      | 0.78   | 2.80 | 1.61                    | 0.70   | 3.69 | 1.26         | 0.46   | 3.47 | 0.72                            |
| Vascular disease (ref: no)                              | 1.24                      | 0.89   | 1.72 | 1.17                    | 0.76   | 1.80 | 1.33         | 0.80   | 2.21 | 0.70                            |
| AC Treatment (ref: no)                                  | 2.10                      | 1.49   | 2.95 | 2.33                    | 1.41   | 3.84 | 1.86         | 1.16   | 2.99 | 0.53                            |
| Race: Asian/Chinese (ref: Caucasian/Hispanic/Latino)    | 0.60                      | 0.40   | 0.90 | 0.69                    | 0.41   | 1.17 | 0.52         | 0.27   | 0.99 | 0.51                            |
| Ex-smoker (ref: no)                                     | 1.26                      | 0.91   | 1.73 | 1.30                    | 0.86   | 1.97 | 1.13         | 0.63   | 2.01 | 0.76                            |
| Current smoker (ref: no)                                | 1.65                      | 1.06   | 2.57 | 1.51                    | 0.84   | 2.70 | 1.96         | 0.93   | 4.12 | -                               |
| Permanent AF (ref: Paroxysmal)                          | 1.00                      | 0.63   | 1.58 | 1.57                    | 0.84   | 2.96 | 0.60         | 0.29   | 1.23 | 0.27                            |
| Persistent AF (ref: Paroxysmal)                         | 1.09                      | 0.70   | 1.70 | 1.33                    | 0.70   | 2.51 | 0.93         | 0.49   | 1.76 | -                               |
| New AF (ref: Paroxysmal)                                | 1.27                      | 0.91   | 1.78 | 1.51                    | 0.89   | 2.54 | 1.11         | 0.71   | 1.73 | -                               |
| Severe Renal disease III-IV-V (ref: I, II, Unknown, no) | 2.04                      | 1.48   | 2.80 | 2.10                    | 1.33   | 3.30 | 1.97         | 1.27   | 3.07 | -                               |

**Supplementary Table 4.** The extent of missing data from the multiple imputation approach

| <b>Variable</b>                            | <b>Missing values</b> | <b>Non-missing values</b> |
|--------------------------------------------|-----------------------|---------------------------|
| <b>Age</b>                                 | 0                     | 28624                     |
| <b>Gender</b>                              | 0                     | 28624                     |
| <b>Body mass index</b>                     | 6089                  | 22535                     |
| <b>Indicator of death</b>                  | 150                   | 28474                     |
| <b>Indicator of stroke/SE</b>              | 150                   | 28474                     |
| <b>Indicator of bleed</b>                  | 150                   | 28474                     |
| <b>Type of AF</b>                          | 2                     | 28622                     |
| <b>Race</b>                                | 828                   | 27796                     |
| <b>Diabetes</b>                            | 2                     | 28622                     |
| <b>Hypertension</b>                        | 2                     | 28622                     |
| <b>Previous stroke</b>                     | 2                     | 28622                     |
| <b>Congestive heart failure</b>            | 2                     | 28622                     |
| <b>Vascular disease</b>                    | 2                     | 28622                     |
| <b>Chronic kidney disease</b>              | 3                     | 28,621                    |
| <b>AC treatment</b>                        | 408                   | 28216                     |
| <b>History of bleeding</b>                 | 75                    | 28549                     |
| <b>Hypercholesterolemia</b>                | 548                   | 28076                     |
| <b>HAS-BLED</b>                            | 9177                  | 19447                     |
| <b>CHA<sub>2</sub>DS<sub>2</sub> -VASc</b> | 673                   | 27951                     |
| <b>Smoking</b>                             | 2581                  | 26043                     |

Note: CHA<sub>2</sub>DS<sub>2</sub>-VASc, HAS-BLED, BMI, and Hypercholesterolemia were not used in models presented in Table 2.

**Supplementary Table 5.** Analysis of on international normalised ratio (INR) control based on time in therapeutic range (TTR) by gender. Based on an international guideline-defined INR range of between 2.0 and 3.0\*

|               | <b>n</b> | <b>Mean TTR</b> | <b>Standard deviation</b> |
|---------------|----------|-----------------|---------------------------|
| <b>Female</b> | 3538     | 55.2            | 26.9                      |
| <b>Male</b>   | 4385     | 55.6            | 27.1                      |
| <b>Total</b>  | 7923     | 55.4            | 27.0                      |

\*Notes: TTR was estimated between two consecutive INR readings only if the interval did not exceed 90 days. Implausible INR values of less than 0.8 or greater than 20 were excluded. Patients on VKA treatment at enrolment, but with fewer than three readings during the follow-up, were excluded from the analysis. Patient-level TTR was estimated by linear interpolation (according to Rosendaal et al. *Thromb Haemost* 1993;69(3):236-9) using 2.0–3.0 as the target INR range.



**Supplementary Figure 1. One year event rates (per 100 person-years) and adjusted hazard ratios according to gender.**
